# Supplementary material for: Ribosomal Stalk Protein Silencing Partially Corrects the ΔF508-CFTR Functional Expression Defect
Source: PubMed Central journal article supplement (PMC4864299; doi:10.1371/journal.pbio.1002462), 2016-05-11
Supplement: pbio.1002462.s010.pdf [file pbio.1002462.s010.pdf]

| <b>Gene symbol</b> | <b>Product name</b> | <b>SiRNA target sequence</b> |
|--------------------|---------------------|------------------------------|
| <i>TBC1D22A</i>    | Hs_TBC1D22A_1       | TACGATTCTAGGAACGACGAA        |
| <i>TBC1D22A</i>    | Hs_TBC1D22A_3       | TACG TTCAGGGTATAAATGAT       |
| <i>TBC1D22B</i>    | Hs_TBC1D22B_5       | CAGAACGGTCCCAGTCAACGA        |
| <i>TBC1D22B</i>    | Hs_TBC1D22B_7       | CCAGGGAGGTTCGACCTATAA        |
| <i>RPL12</i>       | Hs_RPL12_6          | CAGCCAGTTAAGCACAAAGGA        |
| <i>RPL12</i>       | Hs_RPL12_11         | AACCACCAAGAGACAGAAAGA        |
| <i>RPSA</i>        | Hs_LAMR1_1          | TCGACATGAGTTGTACTTCTA        |
| <i>RPSA</i>        | Hs_LAMR1_2          | TACCTGGGATTGCATATCAAA        |
| <i>EXOSC10</i>     | Hs_EXOSC10_4        | CAGGGACATCTGCCTCAAGAA        |
| <i>EXOSC10</i>     | Hs_EXOSC10_5        | AGCCATCGTTAAGGTCTTTCA        |
| <i>EXOSC10</i>     | Hs_EXOSC10_6        | AAGGAACCTCAGGGCATCATA        |
| <i>SKIV2L</i>      | Hs_SKIV2L_1         | CACGTACACTATGATCCTCAA        |
| <i>SKIV2L</i>      | Hs_SKIV2L_2         | CACCGTTATCCTGCTCTGCAA        |
| <i>SKIV2L</i>      | Hs_SKIV2L_4         | CCCGAGGAGCCTTCCATACAA        |
| <i>POMP</i>        | Hs_POMP_1           | CAGG TTCAGCGTCTTCCATTT       |
| <i>POMP</i>        | Hs_POMP_2           | TTGGTCTGGTCTTTAAGTGAA        |
| <i>POMP</i>        | Hs_POMP_3           | TAAACTTGGTTTACTGTAAATA       |
| <i>TTC37</i>       | Hs_TTC37_5          | TTGGGTACTTAAACGAACAT         |
| <i>TTC37</i>       | Hs_TTC37_6          | AAGCCGTAGACTACATAGAAA        |
| <i>RPLP0</i>       | Hs_RPLP0_1          | AAGTGCTTGATATCACAGAGG        |
| <i>RPLP0</i>       | Hs_RPLP0_2          | AATCCTGAGTGATGTGCAGCT        |
| <i>RPLP0</i>       | Hs_RPLP0_7          | TTGGCTACTTTGTTTCGCATTA       |
| <i>RPLP1</i>       | Hs_RPLP1_1          | AAGAAAGTGGAAGCAAAGAAA        |
| <i>RPLP1</i>       | Hs_RPLP1_6          | CTGCACGACGATGAGGTGACA        |
| <i>RPLP2</i>       | Hs_RPLP2_1          | CAAGGTTATCAGTGAGCTGAA        |
| <i>RPLP2</i>       | Hs_RPLP2_2          | AAGGAGGAGTCTGAAGAGTCA        |
| <i>EEF2</i>        | Hs_EEF2_1           | CCGCGCCATCATGGACAAGAA        |
| <i>EEF2</i>        | Hs_EEF2_3           | CTGGCCGAGGACATCGATAAA        |
| <i>EEF2</i>        | Hs_EEF2_5           | TACCGCGAGACGGTCAGTGAA        |
| <i>EIF4E</i>       | Hs EIF4E_1          | AAGAGCGGCTCCACCACTAAA        |
| <i>EIF4E</i>       | Hs EIF4E_8          | CAAAGCTTTGCTACAAATTTA        |
