# Supplementary material for: Ribosomal Stalk Protein Silencing Partially Corrects the ΔF508-CFTR Functional Expression Defect
Source: PubMed Central journal article supplement (PMC4864299; doi:10.1371/journal.pbio.1002462), 2016-05-11
Supplement: pbio.1002462.s011.pdf [file pbio.1002462.s011.pdf]

| <b>Gene symbol</b> | <b>Direction</b> | <b>Sequence</b>         |
|--------------------|------------------|-------------------------|
| <i>CFTR</i>        | forward          | AGTGGAGGAAAGCCTTTGGAGT  |
| <i>CFTR</i>        | reverse          | ACAGATCTGAGCCCAACCTCA   |
| <i>RPL12</i>       | forward          | GACCCCAACGAGATCAAAGT    |
| <i>RPL12</i>       | reverse          | TGGCAATGTCATCACCAACT    |
| <i>RPLP0</i>       | forward          | GCGACCTGGAAGTCCAACTA    |
| <i>RPLP0</i>       | reverse          | GGATCTGCTGCATCTGCTTG    |
| <i>RPLP1</i>       | forward          | ACGGAGGATAAGATCAATGCC   |
| <i>RPLP1</i>       | reverse          | CAGATGAGGCTCCCAATGTT    |
| <i>RPLP2</i>       | forward          | ATCTTGACAGCGTGGGTAT     |
| <i>RPLP2</i>       | reverse          | ACCAGCAGGTACACTGGCA     |
| <i>EEF2</i>        | forward          | CTGGAGATCTGCCTGAAGGA    |
| <i>EEF2</i>        | reverse          | GACTTGGAGAGGCAGAGCAC    |
| <i>EIF4E</i>       | forward          | GCCAATCCGTTTGAATCT      |
| <i>EIF4E</i>       | reverse          | GGGATTAGGAGTAGGGGTGG    |
| <i>GAPDH</i>       | forward          | CATGAGAAGTATGACAACAGCCT |
| <i>GAPDH</i>       | reverse          | AGTCCTTCCACGATACCAAAGT  |
